# Supplementary figures and images for: Complex three-dimensional tungsten oxide nanowire networks: controllable synthesis and growth mechanism
Source: Royal Society of Chemistry journal article supplement (doi:10.1039/c4ce01715c), 2014-11-24

Supplementary Material:

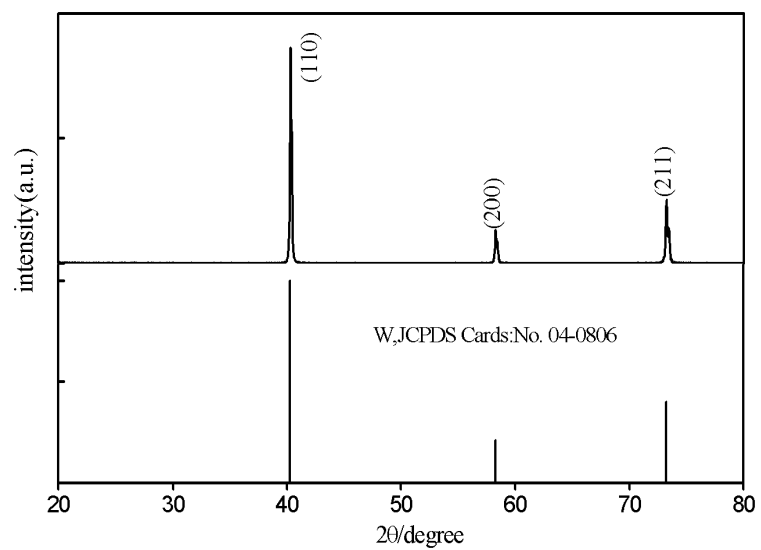

Fig. S1 XRD spectrum of the tungsten powder

Supplement: c4ce01715c1.pdf [file c4ce01715c1.pdf]
